# Supplementary material
Source: PubMed Central journal article supplement (PMC6182116)
Supplement: supp_6.4.E436_2018-0046-1-at.pdf [file supp_6.4.E436_2018-0046-1-at.pdf]

**Appendix 1 (as supplied by the authors): Ontario Ministry of Health and Long-Term Care funding criteria for cffDNA screening**

---

**Category I criteria:**

A singleton gestation with appropriate pre-test counselling including discussion of the limitation of the test, and with any one of the following:

- A multiple marker screening test positive for aneuploidies
- Women with advanced maternal age, defined as  $\geq 40$  at the expected time of delivery
- Fetal nuchal translucency (NT)  $\geq 3.5$ mm
- Pregnancy history of aneuploidy/previous child with aneuploidy

**Category II criteria:**

Must be submitted by a geneticist or maternal fetal medicine specialist

- Fetal congenital anomalies identified on ultrasound which are suggestive of trisomy 21, 19 or 13
  - Risk of aneuploidy for trisomy 21, 18 or 13 >that of a positive multiple marker screening  
(Women <40 year at EDD must have at least one other risk factor noted. The risk of aneuploidy can be calculated by including any combination of risk indicators)
    - Twin pregnancy
    - Soft markers (e.g. cystic hygroma, hyper echogenic bowel, absent nasal bone)
  - CffDNA for sex chromosome determination
    - Risk of a sex-limited disorder
    - Ultrasound findings suggestive of either a sex chromosome aneuploidy
    - Ultrasound findings of a disorder of sex determination
-
