# Supplementary material
Source: PubMed Central journal article supplement (PMC6182116)
Supplement: supp_6.4.E436_original-submission.pdf [file supp_6.4.E436_original-submission.pdf]

**Prenatal screening and diagnostic testing in Ontario:  
A descriptive analysis of service utilization in the era of cell-free fetal DNA testing**

|                               |                                                                                                                                                                                                                                                                                                                                                                                                                                                                                                                                                                                                                                                                                                                                                                                                                                                                                                                                                                                                                                   |
|-------------------------------|-----------------------------------------------------------------------------------------------------------------------------------------------------------------------------------------------------------------------------------------------------------------------------------------------------------------------------------------------------------------------------------------------------------------------------------------------------------------------------------------------------------------------------------------------------------------------------------------------------------------------------------------------------------------------------------------------------------------------------------------------------------------------------------------------------------------------------------------------------------------------------------------------------------------------------------------------------------------------------------------------------------------------------------|
| Journal:                      | <i>CMAJ Open</i>                                                                                                                                                                                                                                                                                                                                                                                                                                                                                                                                                                                                                                                                                                                                                                                                                                                                                                                                                                                                                  |
| Manuscript ID                 | CMAJOpen-2018-0046                                                                                                                                                                                                                                                                                                                                                                                                                                                                                                                                                                                                                                                                                                                                                                                                                                                                                                                                                                                                                |
| Manuscript Type:              | Cohort (retrospective)                                                                                                                                                                                                                                                                                                                                                                                                                                                                                                                                                                                                                                                                                                                                                                                                                                                                                                                                                                                                            |
| Date Submitted by the Author: | 26-Mar-2018                                                                                                                                                                                                                                                                                                                                                                                                                                                                                                                                                                                                                                                                                                                                                                                                                                                                                                                                                                                                                       |
| Complete List of Authors:     | Huang, Tianhua; Ontario Prenatal Screening Program, BORN Ontario<br>Dougan, Shelley; Ontario Prenatal Screening Program, BORN Ontario<br>Walker, Mark; University of Ottawa<br>Armour, Christine; Children's Hospital of Eastern Ontario, Ontario Prenatal Screening Program, BORN Ontario<br>Okun, Nan; Mt. Sinai Hospital, Ontario Prenatal Screening Program, BORN Ontario                                                                                                                                                                                                                                                                                                                                                                                                                                                                                                                                                                                                                                                     |
| Keywords:                     | Genetics, Health services research, Obstetrics and gynecology                                                                                                                                                                                                                                                                                                                                                                                                                                                                                                                                                                                                                                                                                                                                                                                                                                                                                                                                                                     |
| More Detailed Keywords:       | Prenatal screening, cell free fetal DNA screening, prenatal diagnostic testing, trisomy 21, utilization, uptake rate                                                                                                                                                                                                                                                                                                                                                                                                                                                                                                                                                                                                                                                                                                                                                                                                                                                                                                              |
| Abstract:                     | <p><b>Abstract</b></p> <p><b>Background</b><br/>To assess the impact of publicly funded cell-free fetal DNA (cfDNA) screening on the utilization of multiple marker prenatal screening (MMS), cfDNA screening and prenatal diagnostic testing (PND) for fetal chromosomal aneuploidies in Ontario.</p> <p><b>Methods</b><br/>A retrospective cohort study based on data collected by the Better Outcomes Registry &amp; Network (BORN) was performed. Descriptive statistics were generated to describe the utilization of MMS, cfDNA screening, and PND. The regional variations in the utilization of MMS and cfDNA screening were assessed by Census divisions and Local Health Integration Networks.</p> <p><b>Results</b><br/>The study included 534,210 singleton pregnancies. After cfDNA screening was funded for specific indications, the uptake of MMS increased slightly from 66.5% to 68.1%. The uptake of cfDNA screening among MMS positive women increased substantially from 3.2% to 48.8%. In contrast, PND</p> |

1  
2  
3  
4  
5  
6  
7  
8  
9  
10  
11  
12  
13  
14  
15  
16  
17  
18  
19  
20  
21  
22  
23  
24  
25  
26  
27  
28  
29  
30  
31  
32  
33  
34  
35  
36  
37  
38  
39  
40  
41  
42  
43  
44  
45  
46  
47  
48  
49  
50  
51  
52  
53  
54  
55  
56  
57  
58  
59  
60

|  |                                                                                                                                                                                                                                                                                                                                                                                                                                                                                                                                                                                                                                                                                                                                              |
|--|----------------------------------------------------------------------------------------------------------------------------------------------------------------------------------------------------------------------------------------------------------------------------------------------------------------------------------------------------------------------------------------------------------------------------------------------------------------------------------------------------------------------------------------------------------------------------------------------------------------------------------------------------------------------------------------------------------------------------------------------|
|  | <p>among MMS positive women decreased from 54.9% to 30.8%. Follow-up testing (cfDNA/PND) among the MMS positive group increased from under 60% to 75%. Although women <math>\geq 40</math> years are eligible for primary cfDNA screening, there was only a small decrease in the use of MMS in this group (from 75.7% to 72.2%). After cfDNA screening was funded, the greatest use of cfDNA screening and greatest decline in of PND were seen in women with a MMS risk in the range of 1 in 101 to 1 in 200.</p> <p>Interpretation:</p> <p>The changing patterns of uptake of screening and diagnostic tests demonstrate the significant impact of public policy and funding decisions on women's choices regarding prenatal testing.</p> |
|  |                                                                                                                                                                                                                                                                                                                                                                                                                                                                                                                                                                                                                                                                                                                                              |

SCHOLARONE™  
Manuscripts

Confidential

1  
2  
3 **Prenatal screening and diagnostic testing in Ontario:**  
4

5 **A descriptive analysis of service utilization in the era of cell-free fetal DNA testing**  
6  
7

8  
9  
10 4 Tianhua Huang, MBBS. PhD,<sup>1,2</sup> Shelley Dougan, MPA, MSc,<sup>1</sup> Mark Walker, MD,<sup>1</sup> Christine  
11  
12 5 M. Armour, MD,<sup>1,3</sup> Nan Okun, MD<sup>1,4</sup>  
13  
14

15  
16 6 1. Ontario Prenatal Screening Program, Better Outcomes Registry & Network (BORN) Ontario,  
17  
18 7 Ottawa, Ontario, Canada  
19

20  
21 8 2. Genetic Program, North York General Hospital, Toronto, Ontario, Canada  
22

23  
24 9 3. Regional Genetics Program, Children's Hospital of Eastern Ontario, Ottawa, Ontario, Canada  
25

26  
27 10 4. Maternal Fetal Medicine Program, Mt. Sinai Hospital, University of Toronto, Toronto,  
28  
29 11 Ontario, Canada  
30

31  
32  
33 12  
34  
35  
36 13  
37  
38  
39 14 Corresponding author: Tianhua Huang  
40

41  
42 15 Ontario Prenatal Screening Program, Better Outcomes Registry & Network (BORN) Ontario,  
43

44 16 CHEO Research Institute, CPCR Building, 401 Smyth Road, Ottawa, Ontario, K1H 8L1, Canada  
45

46  
47 17 Tel: 416 756 6288  
48

49  
50 18 E-mail: tianhua.huang@nygh.on.ca  
51

52 19  
53  
54  
55  
56  
57  
58  
59  
60

1  
2  
3  
4  
5  
6  
7  
8  
9  
10  
11  
12  
13  
14  
15  
16  
17  
18  
19  
20  
21  
22  
23  
24  
25  
26  
27  
28  
29  
30  
31  
32  
33  
34  
35  
36  
37  
38  
39  
40  
41  
42  
43  
44  
45  
46  
47  
48  
49  
50  
51  
52  
53  
54  
55  
56  
57  
58  
59  
60

20 Contributor statement:

21 Tianhua Huang contributed to conception and design, performed data analysis, interpreted data  
22 and drafted the article, and agreed to act as guarantors of the work presented in this article. Nan  
23 Okun, Shelley Dougan and Christine Armour contributed substantially to conception and design,  
24 interpretation of data, and revised the manuscript. Mark Walker contributed to the interpretation  
25 of data, revised the manuscript critically. All authors gave the final approval of version to be  
26 published.

28 Short title: Utilization of multiple marker screening, cfDNA screening and diagnostic testing

30 Key words: Prenatal screening, cell free fetal DNA screening, prenatal diagnostic testing,  
31 trisomy 21, utilization, uptake rate.

32 Funding sources: None

33 Conflicts of interest: None declared

34

1  
2  
3 35 Abstract  
4  
5

6 36 Background  
7

8 37 To assess the impact of publicly funded cell-free fetal DNA (cfDNA) screening on the utilization  
9  
10 38 of multiple marker prenatal screening (MMS), cfDNA screening and prenatal diagnostic testing  
11  
12 39 (PND) for fetal chromosomal aneuploidies in Ontario.  
13  
14

15 40

16  
17 41 Methods  
18  
19

20 42

21  
22 43 A retrospective cohort study based on data collected by the Better Outcomes Registry &  
23  
24 44 Network (BORN) was performed. Descriptive statistics were generated to describe the utilization  
25  
26 45 of MMS, cfDNA screening, and PND. The regional variations in the utilization of MMS and  
27  
28 46 cfDNA screening were assessed by Census divisions and Local Health Integration Networks.  
29  
30

31 47

32  
33 48 Results  
34  
35

36 49

37  
38 50 The study included 534,210 singleton pregnancies. After cfDNA screening was funded for  
39  
40 51 specific indications, the uptake of MMS increased slightly from 66.5% to 68.1%. The uptake of  
41  
42 52 cfDNA screening among MMS positive women increased substantially from 3.2% to 48.8%. In  
43  
44 53 contrast, PND among MMS positive women decreased from 54.9% to 30.8%. Follow-up testing  
45  
46 54 (cfDNA/PND) among the MMS positive group increased from under 60% to 75%. Although  
47  
48 55 women  $\geq 40$  years are eligible for primary cfDNA screening, there was only a small decrease in  
49  
50 56 the use of MMS in this group (from 75.7% to 72.2%). After cfDNA screening was funded, the  
51  
52  
53  
54  
55  
56  
57  
58  
59  
60

1  
2  
3  
4  
5  
6  
7  
8  
9  
10  
11  
12  
13  
14  
15  
16  
17  
18  
19  
20  
21  
22  
23  
24  
25  
26  
27  
28  
29  
30  
31  
32  
33  
34  
35  
36  
37  
38  
39  
40  
41  
42  
43  
44  
45  
46  
47  
48  
49  
50  
51  
52  
53  
54  
55  
56  
57  
58  
59  
60

57 greatest use of cfDNA screening and greatest decline in of PND were seen in women with a  
58 MMS risk in the range of 1 in 101 to 1 in 200.

59  
60 Interpretation:

61  
62 The changing patterns of uptake of screening and diagnostic tests demonstrate the significant  
63 impact of public policy and funding decisions on women’s choices regarding prenatal testing.

64  
65  
66

Confidential

1  
2  
3 67 Introduction  
4  
5  
6 68  
7

8 69 In Ontario, about 67% of pregnant women had multiple marker screening (MMS) for fetal  
9  
10 70 chromosomal aneuploidies during their pregnancies.<sup>1</sup> MMS incorporates serum biochemical  
11  
12 71 markers, and in most instances, a ultrasound marker nuchal translucency (NT) measured  
13  
14 72 between 11 and 13 weeks gestation. Until recently, the most commonly used screening tests in  
15  
16 73 Ontario have been the Integrated Prenatal Screen (IPS) and the First Trimester Screen (FTS)  
17  
18 74 which has been recently updated to “enhanced” FTS (eFTS). The IPS and FTS provide detection  
19  
20 75 rates (DR) of about 85% with false positive rates (FPR) of 2.5-5%.<sup>2 3</sup> Although MMS is  
21  
22 76 routinely offered to all pregnant women, there has been substantial variation in overall uptake  
23  
24 77 rate across the province, as well as variation in the MMS test undertaken.<sup>4</sup>  
25  
26  
27  
28  
29

30  
31 79 Cell-free fetal DNA (cfDNA) screening is based on sequencing of cell-free fetal DNA in  
32  
33 80 maternal plasma. The test provides a DR of approximately 99% and a FPR of < 0.1% for  
34  
35 81 trisomy 21.<sup>5</sup> CfDNA for specific aneuploidies became available in Ontario in late 2012 on a  
36  
37 82 private-pay basis. In early 2014, the Ontario Ministry of Health and Long Term Care  
38  
39 83 (MOHLTC) began to fund cfDNA screening for women whose pregnancies were identified to be  
40  
41 84 at increased risk for one of the common aneuploidies including women with a positive MMS  
42  
43 85 result, certain abnormal ultrasound findings or advanced maternal age ( $\geq 40$  years), among other  
44  
45 86 eligibility criteria (Appendix 1). Other jurisdictions have also incorporated cfDNA screening into  
46  
47 87 traditional prenatal screening paradigms,<sup>6</sup> though there is limited literature describing the effect  
48  
49 88 of the systematic incorporation of cfDNA screening on prenatal screening and diagnostic test  
50  
51 89 utilization at a population level.  
52  
53  
54  
55  
56  
57  
58  
59  
60

1  
2  
3  
4  
5  
6  
7  
8  
9  
10  
11  
12  
13  
14  
15  
16  
17  
18  
19  
20  
21  
22  
23  
24  
25  
26  
27  
28  
29  
30  
31  
32  
33  
34  
35  
36  
37  
38  
39  
40  
41  
42  
43  
44  
45  
46  
47  
48  
49  
50  
51  
52  
53  
54  
55  
56  
57  
58  
59  
60

90

91 Before cfDNA screening was publicly funded, women whose MMS result indicated an increased  
92 risk for trisomy 21 or 18 were offered genetic counselling and the option of confirmatory  
93 invasive prenatal diagnostic testing (PND), via amniocentesis or chorionic villus sampling  
94 (CVS). The introduction of cfDNA screening, with its low FPR and false negative rates, has been  
95 shown to reduce the usage of diagnostic testing.<sup>7 8</sup>

96

97 The current study aims to assess the utilization pattern of MMS and PND prior to, and after  
98 cfDNA screening was introduced into a general population setting in Ontario, Canada using data  
99 collected by the Better Outcomes Registry & Network (BORN) Registry.

100

101

102

Confidential



1  
2  
3 **103 Methods**  
4

5 104  
6

7  
8 Datasets  
9

10 106  
11

12 107 This is a retrospective cohort study based on a secondary analysis of data collected by BORN.  
13

14 108 BORN is a prescribed registry under the Personal Health Information Protection Act (PHIPA).  
15

16 109 The BORN information system (BIS) routinely collects information on pregnancy (including  
17

18 110 MMS), labour, birth, and early newborn care from all hospitals, midwifery practices, and  
19

20 111 prenatal screening centres in Ontario, as well as from Newborn Screening Ontario. The real-time  
21

22 112 data collection into the BIS began on January 1 2012. In addition, BORN has retrospectively  
23

24 113 collected data on all cfDNA screening provided to Ontario residents, as well as data on  
25

26 114 diagnostic testing from all but one cytogenetic laboratory in Ontario. The study population  
27

28 115 includes all pregnant women who had a singleton pregnancy and an expected date of delivery  
29

30 116 (EDD) between July 1 2012 and March 31, 2016.  
31  
32

33 117  
34

35 118 To link legacy cfDNA screening and cytogenetic testing data with the BIS records, each cfDNA  
36

37 119 screening and cytogenetic record was assigned to a series of BIS identifiers including maternal  
38

39 120 person ID, pregnancy ID, birth ID and infant person ID through record matching. The record  
40

41 121 matching was performed by BORN data analysts and achieved through deterministic and  
42

43 122 probabilistic matching using maternal and newborns' health care number, date of birth, name,  
44

45 123 sex and postal code. Overall, 91.1 % (12,755/13,999) of cfDNA screening and 81.3%  
46

47 124 (12,279/15,107) of cytogenetic records could be matched to a pregnancy record in the BIS. In  
48

49 125 over 95% of occasions, cfDNA screening and cytogenetic records were matched to a correct  
50  
51  
52  
53

1  
2  
3 126 pregnancy. Unmatched records were mostly likely miscarriages or terminations before 20 weeks  
4  
5 127 of gestation, as these data points were not systematically captured by BORN during this time  
6  
7  
8 128 period. As well, they may also be records from non-Ontario patients. Records of MMS, amniotic  
9  
10 129 fluid alpha-fetoprotein (AFP) testing, cfDNA screening and cytogenetic testing were  
11  
12 130 subsequently linked with pregnancy records by pregnancy ID. The linked data set was used in  
13  
14  
15 131 the study.  
16

17 132  
18  
19 133 In Ontario, amniocentesis is the main form of prenatal diagnostic testing. Chorionic villus  
20  
21 134 sampling is performed in a small number of high risk centres. To maximize ascertainment, the  
22  
23 135 number of amniocenteses in this study was ascertained through a combination of amniotic fluid  
24  
25 136 AFP records (as AFP was measured on almost all amniotic fluid samples) and cytogenetic  
26  
27 137 records indicating amniocentesis as the tissue type. As entry of CVS testing as a data point is not  
28  
29 138 systematically collected in the BIS, the use of CVS was based on information collected from  
30  
31 139 cytogenetic records.  
32

33  
34  
35 140

36  
37  
38 141

39  
40 142 Data analysis  
41

42  
43 143  
44

45 144 In this study, we used uptake rates to describe the utilization of MMS screening, cfDNA  
46  
47 145 screening and PND. The numerator of uptake rate was number of singleton pregnancies in  
48  
49 146 Ontario that had a MMS, cfDNA screening or PND. The denominator was singleton pregnancies  
50  
51 147 in Ontario with a defined character (e.g. all pregnancies, MMS positive pregnancies etc).  
52  
53  
54 148 Expected date of delivery was used to describe date ranges. The regional variations in the  
55  
56  
57

1  
2  
3 149 utilization of MMS and cfDNA screening were described by Census division (CD) and Local  
4  
5 150 Health Integration Networks (LHIN). Census division describes provincially legislated  
6  
7 151 geographic areas that are intermediate between the province/territory level and the municipality;  
8  
9 152 they have been established in provincial law to facilitate regional planning and service  
10  
11 153 provision.<sup>9</sup> LHINs were established under the Local Health System Integration Act, 2006 for  
12  
13 154 health care services planning, funding and management. There are 49 CDs and 14 LHINs in  
14  
15 155 Ontario.<sup>10</sup> To assess how women may be using MSS to make decisions, the utilization of cfDNA  
16  
17 156 screening and PND by MSS risk cut-off were also examined.  
18  
19  
20  
21  
22  
23

24 158 Descriptive statistics were generated to describe the utilization of MMS, cfDNA screening, and  
25  
26 159 PND. The Chi-square test was used to compare the uptake rates of these tests prior and after the  
27  
28 160 introduction of funded cfDNA screening for higher risk pregnancies. The Cochran-Armitage test  
29  
30 161 was used examine the temporal changes in the utilization of these tests.  
31  
32  
33  
34

35 163 The study was approved by the Research Ethics Board of Children's Hospital of Eastern Ontario.  
36  
37  
38 164  
39  
40  
41  
42  
43  
44  
45  
46  
47  
48  
49  
50  
51  
52  
53  
54  
55  
56  
57  
58  
59  
60

1  
2  
3 **165 Results:**  
4

5 166  
6  
7 167 There were 534,210 singleton pregnancies during the study period. 359,066 had a MMS yielding  
8  
9  
10 168 an overall MMS uptake rate of 67.2%. Figure 1 shows the uptake of MSS by census division and  
11  
12 169 in the LHINs with lowest and highest MMS uptake rates. There were substantial variations in  
13  
14 170 different geographic areas in Ontario; from under 30% in North West LHIN to over 83% for  
15  
16  
17 171 Toronto Central LHIN.  
18

19  
20 172 Over the study period, 11,102 (2.1%) singleton pregnancies underwent cfDNA screening, with a  
21  
22 173 dramatic increase after funding from 854 in 2013, to 6,298 in 2015. Figure 2 shows the uptake  
23  
24 174 rate of cfDNA screening by census division among pregnancies with a positive MMS result  
25  
26 175 following MOHLTC funding for high risk pregnancies in 2014. Also shown are the LHINs with  
27  
28 176 the lowest and highest utilization of cfDNA screening following a positive MMS. Again there  
29  
30 177 are substantial regional variations noted, with a 2.7- fold higher cfDNA screening uptake rate in  
31  
32 178 Toronto Central LHIN (64.5%) compared to that for North West LHIN (24.2%).  
33  
34  
35

36 179  
37  
38 180 During the study period, 11,261 (2.1%) singleton pregnancies had a PND. There were with  
39  
40 181 10,312 amniocenteses and 949 CVS. Figure 3 shows key pathways of prenatal screening before  
41  
42 182 and after cfDNA screening was funded. After cfDNA screening was funded, the update rate of  
43  
44 183 MMS increased slightly ( $p<0.001$ ). PND among MMS positive women decreased substantially  
45  
46 184 from 54.9% to 30.8% ( $p<0.001$ ).  
47  
48  
49

50 185  
51  
52 186 After women age $\geq$ 40 years became eligible for primary cfDNA screening in 2014. The uptake of  
53  
54 187 cfDNA screening in this age group increased from 2.4% to 33%, yet only 7.2% had primary  
55  
56  
57

1  
2  
3 188 cfDNA screening (data not shown in the figure). This was accompanied by only a small decrease  
4  
5 189 (from 75.7% to 72.2%,  $p<0.001$ ) in the uptake of MMS in this group.  
6  
7

8 190  
9  
10 191 Figure 4 demonstrates graphically the uptake rates of MMS, cfDNA screening and/or PND  
11  
12 192 among all pregnancies over the study period. CfDNA screening uptake increased from under  
13  
14 193 1.0% in 2012 to over 4.0% in 2016 ( $p<0.001$ ). The uptake of PND decreased by over 50%, and  
15  
16 194 the proportion of women who had a follow up testing (either NIPT screening or PND) more than  
17  
18 195 doubled ( $p<0.001$ ).  
19  
20

21 196  
22  
23 197 Figure 5 shows the changes in the uptake rates of cfDNA screening and PND in pregnancies with  
24  
25 198 a positive MMS over the study period. There was a steady increase in the uptake of cfDNA  
26  
27 199 screening with a consistent decrease in the uptake of diagnostic testing after cfDNA screening  
28  
29 200 was funded ( $p<0.01$ ). The proportion of women who had a follow up testing increased from  
30  
31 201 about 60% to 75% ( $p<0.001$ ).  
32  
33  
34

35 202  
36  
37 203  
38  
39 204 Table 1 shows the highest uptake of PND was seen in women with a MMS risk  $\geq 1$  in 10 both  
40  
41 205 before and after cfDNA screening was funded. There was a relatively smaller decrease in the rate  
42  
43 206 of PND as the follow-up test in this group compared to those with lower risk MMS results, The  
44  
45 207 greatest decline in the uptake of PND after funding was seen in women with a MMS risk in the  
46  
47 208 range of 1 in 101 to 1 in 200 (from 51% to 23.5%). This group also had the highest uptake of  
48  
49 209 cfDNA screening (55.1%) and biggest increase in the uptake of a follow-up testing (from 56.3%  
50  
51 210 to 76%).  
52  
53  
54  
55  
56  
57  
58  
59  
60

1  
2  
3 **211 Interpretation:**  
4

5  
6 212

7  
8 213 Our study examined utilization patterns of MMS, cfDNA screening and PND testing in Ontario  
9  
10 214 and specifically evaluated the impact of publicly funded cfDNA screening on the utilization of  
11  
12 215 prenatal screening and diagnostic testing.  
13

14  
15 216

16  
17 217 Over the study period, 67.6% of pregnant women had a prenatal screening test (whether MMS,  
18  
19 218 cfDNA screening or both). Substantial variations were observed in overall uptake rates of  
20  
21 219 prenatal screening across the province. There was a small increase in the overall uptake of MMS,  
22  
23 220 which became more marked after publically funded cfDNA screening was introduced for higher  
24  
25 221 risk pregnancies. Accompanying this trend was a decrease in PND following a positive MMS,  
26  
27 222 with a more marked decline after funding and an increase in the uptake cfDNA screening  
28  
29 223 secondary to a positive MMS. Possible explanations for increased MMS uptake include  
30  
31 224 heightened awareness of screening following advertising of cfDNA screening. Another possible  
32  
33 225 reason is that women were interested in cfDNA screening and underwent MSS to determine if  
34  
35 226 they would be eligible via a positive MMS. Furthermore, a positive test for MSS, followed by a  
36  
37 227 second blood test, cfDNA, may be more appealing than having to have an invasive procedure  
38  
39 228 such as amniocentesis.  
40  
41  
42  
43  
44

45 229

46  
47 230 The uptake patterns of cfDNA screening demonstrate the significant impact of public policy and  
48  
49 231 funding decisions on patterns of prenatal testing. The utilization of cfDNA testing increased  
50  
51 232 markedly following funding amongst women age  $\geq 40$  years and those with a positive MMS  
52  
53 233 result when it became a funded alternative to PND. Interestingly, only 33% of women  $>40$  years  
54  
55  
56  
57

1  
2  
3 234 of age had cfDNA screening and only 7.2% had it as a primary screening test. In this study, we  
4  
5 235 were not able to assess any details on counselling provided to pregnant women choosing prenatal  
6  
7 236 testing options. However, these results suggest that previous Canadian policy guidelines to  
8  
9 237 exclude maternal age alone as an indicator for invasive PND <sup>11</sup> continues to be operative, with  
10  
11 238 most women aged 40 or older still undergoing MMS first, vs primary cfDNA screening. MMS  
12  
13 239 can provide additional information on pregnancy health that cfDNA alone cannot provide, and  
14  
15 240 thus may have been chosen by providers for that reason. As well, primary providers are  
16  
17 241 challenged by rapidly changing information in this genomic era of prenatal testing and some of  
18  
19 242 the patterns of utilization demonstrated over the study period may reflect delayed incorporation  
20  
21 243 of these newer technologies. Lastly, there have been anecdotal reports of choosing two screens  
22  
23 244 given that women age  $\geq 40$  years were eligible for both tests.  
24  
25  
26  
27  
28  
29  
30

31 246 Provincial funding of cfDNA screening has been accompanied by a decreased utilization of  
32  
33 247 PND, with the largest decline among those with a risk for Down syndrome lower than 1 in 50  
34  
35 248 (e.g. 1 in 100), The uptake of any form of follow-up testing following a positive MMS  
36  
37 249 increased substantially across all MMS risk groups, but especially among women with a MMS  
38  
39 250 risk lower than 1 in 50 where follow-up PND was less likely prior to funded cfDNA. This  
40  
41 251 suggests that cfDNA screening as a non-invasive and highly accurate alternative to  
42  
43 252 amniocentesis or CVS is positively regarded by pregnant women, or more likely to be suggested  
44  
45 253 by providers, particularly for women at 'intermediate' or 'lower' risk groups.  
46  
47  
48  
49  
50

51 255 There is a wide range in reported uptake rates of MMS in studies from different countries and  
52  
53 256 screening programs; from 35.2% in the Netherlands, to about 76.0% in UK and 91.6% in  
54  
55  
56  
57  
58  
59  
60

1  
2  
3 257 Denmark.<sup>6 12 13</sup> In Ontario, the overall uptake rate increased from 63% to about 68% over the  
4  
5 258 past 5-7 year period,<sup>14 15</sup> but regional variations in the uptake of MMS remain. Because MMS  
6  
7 259 is funded for all Ontario residents by the MOHLTC, it is unlikely the variable regional uptake  
8  
9 260 rates were cost-driven as reported by some studies.<sup>15</sup> While we were not able to account for this  
10  
11 261 variation, lower screening rates have been associated with living in a rural area, receiving first-  
12  
13 262 trimester care from a family physician or midwife and being in a lower income quintile in  
14  
15 263 Ontario suggesting there are areas to target for increased awareness and knowledge translation to  
16  
17 264 support patient choice.<sup>14</sup>  
18  
19  
20  
21  
22  
23  
24  
25

26 267 Multiple recent studies have assessed the impact of cfDNA screening on prenatal screening and  
27  
28 268 diagnostic services.<sup>6 7 8 16 17</sup> Because of the variations in prenatal screening tests and policies for  
29  
30 269 cfDNA screening in these studies, it is difficult to directly compare the magnitude of the impacts.  
31  
32 270 However, we have observed some similar patterns in the utilization of these tests in our  
33  
34 271 population compared to others. In a study by Chitty et al. (2016), the proportion of women  
35  
36 272 having a PND following a positive FTS decreased from 60% to 17.8% after the implementation  
37  
38 273 of cfDNA screening. Of women in the same FTS risk group, 74.4% had cfDNA screening. Chan  
39  
40 274 et al. (2015) reported a 45% decline in the rate of refusal of further testing and a one third  
41  
42 275 reduction in PND after a positive MMS following introduction of cfDNA screening.<sup>16</sup> This  
43  
44 276 marked decline in the utilization of PND following the implementation of cfDNA screening has  
45  
46  
47 277 also been reported by a number of other studies.<sup>7 8 17 18 19</sup>  
48  
49  
50  
51  
52  
53  
54  
55  
56  
57  
58  
59  
60



1  
2  
3 279 Gil et al. (2015) examined the impact of FTS result on the uptake of cfDNA screening.<sup>20</sup> In  
4  
5 280 women with FTS risk  $\geq 1:100$ , 40% opted for CVS, 57% for cfDNA screening and 3% did not  
6  
7  
8 281 want any further testing. In women with risk between 1:101 to 1:1000, the uptake of cfDNA  
9  
10 282 screening was 91.7%. Similar results were reported by Manegold-Brauer et al. (2015)<sup>21</sup> In our  
11  
12 283 population, we observed a reduction of PND in all risk groups, with the biggest reduction seen in  
13  
14  
15 284 women with risk between 1:101 and 1:200.

16  
17  
18 285

19  
20  
21 286 Our study only included women with an EDD up to March 31 2016, therefore we cannot  
22  
23 287 comment on more recent trends to determine a more long term view of the impact of funded  
24  
25 288 cfDNA screening on prenatal screening and diagnostic testing. As well, we could not assess  
26  
27  
28 289 factors accounting for variations in uptake; such as lack of informed choice or sub-optimal  
29  
30 290 counseling/access to MMS, cfDNA screening and PND. We were not able to assess how many  
31  
32 291 women were offered prenatal screening tests and then declined, or the indications for cfDNA  
33  
34 292 screening. Further studies are needed to evaluate the referral and utilization patterns as well as  
35  
36  
37 293 costs and effectiveness of MMS, cfDNA and PND.

38  
39  
40 294

41  
42  
43 295 In conclusion, our study described the utilization patterns of MMS, cfDNA screening and PND  
44  
45 296 testing in Ontario prior to and after cfDNA screening was funded by MOHLTC. The results are  
46  
47  
48 297 useful for screening program planning and further analysis on the costs and benefits of different  
49  
50 298 screening strategies. Further studies are warranted to investigate the factors that affect the  
51  
52 299 utilization of MMS, cfDNA screening and PND in order to improve the efficacy and  
53  
54  
55 300 performance of prenatal screening.

1  
2  
3  
4  
5  
6  
7  
8  
9  
10  
11  
12  
13  
14  
15  
16  
17  
18  
19  
20  
21  
22  
23  
24  
25  
26  
27  
28  
29  
30  
31  
32  
33  
34  
35  
36  
37  
38  
39  
40  
41  
42  
43  
44  
45  
46  
47  
48  
49  
50  
51  
52  
53  
54  
55  
56  
57  
58  
59  
60

301 Acknowledgements

302 Farzana Yasmin performed record matching for this study. Qun Miao provided expert advices on  
303 record linkage and matching. Their expertise and assistants are gratefully acknowledged. The  
304 authors would also like to thank Mari Teitelbaum and Ann Sprague for their great support to this  
305 project.

306

Confidential

1  
2  
3 307 **References:**  
4  
5

- 6 308 1. Prenatal Screening, BORN 2012-2014 Annual Report,  
7  
8 309 <http://bornontario.ca/assets/documents/FINAL%20English%20Jan%202016.pdf>. Retrieved  
9  
10 February 28, 2018  
11  
12  
13  
14 311 2. Okun N, Summers AM, Hoffman B et al. Prospective experience with integrated prenatal  
15  
16 312 screening and first trimester combined screening for trisomy 21 in a large Canadian urban center.  
17  
18 313 Prenat Diagn. 2008;28:987-92.  
19  
20  
21  
22 314 3. Huang T, Dennis A, Meschino WS et al. First trimester screening for Down syndrome using  
23  
24 315 nuchal translucency, maternal serum pregnancy-associated plasma protein A, free- $\beta$  human  
25  
26 316 chorionic gonadotrophin, placental growth factor, and  $\alpha$ -fetoprotein. Prenat Diagn. 2015;35:709-  
27  
28 317 16.  
29  
30  
31  
32 318 4. Prenatal screening rates by LHIN of residency, Born 2014-2016 Biennial Report,  
33  
34 319 [http://www.bornontario.ca/en/about-born/governance/annual-reports/2014-2016-annual-](http://www.bornontario.ca/en/about-born/governance/annual-reports/2014-2016-annual-report/facts-from-ontario/)  
35  
36 320 [report/facts-from-ontario/](http://www.bornontario.ca/en/about-born/governance/annual-reports/2014-2016-annual-report/facts-from-ontario/). Retrieved February 28, 2018  
37  
38  
39  
40 321 5. Gil MM, Quezada MS, Revello R et al. Analysis of cell-free DNA in maternal blood in  
41  
42 322 screening for fetal aneuploidies: updated meta-analysis. Ultrasound Obstet Gynecol  
43  
44 323 2015;45:249-66.  
45  
46  
47 324 6. Chitty LS, Wright D, Hill M, et al Uptake, outcomes, and costs of implementing non-invasive  
48  
49 325 prenatal testing for Down's syndrome into NHS maternity care: prospective cohort study in eight  
50  
51 326 diverse maternity units. BMJ. 2016;354:i3426  
52  
53  
54  
55  
56  
57  
58  
59  
60

- 1  
2  
3 327 7. Williams J 3rd, Rad S, Beauchamp S et al Utilization of noninvasive prenatal testing: impact  
4  
5 328 on referrals for diagnostic testing. *Am J Obstet Gynecol.* 2015;213:102.e1-6.  
6  
7  
8 329 8: Larion S, Warsof SL, Romary L et al. Uptake of noninvasive prenatal testing at a large  
9  
10 330 academic referral center. *Am J Obstet Gynecol.* 2014;211:651.e1-7.  
11  
12  
13  
14 331 9. Census division, Statistics Canada. <http://www12.statcan.gc.ca/census->  
15  
16 332 [recensement/2011/ref/dict/geo008-eng.cfm](http://www12.statcan.gc.ca/census-recensement/2011/ref/dict/geo008-eng.cfm) access on Jan 19, 2017.  
17  
18  
19 333 10. Local Health System Integration Act, 2006.  
20  
21 334 <http://www.health.gov.on.ca/en/common/legislation/lhins/default.aspx>; accessed Jan 19, 2018  
22  
23  
24 335 11. Chitayat D, Langlois S, Douglas Wilson R; SOGC GENETICS COMMITTEE; CCMG  
25  
26 336 PRENATAL DIAGNOSIS COMMITTEE. Prenatal screening for fetal aneuploidy in singleton  
27  
28 337 pregnancies. *J Obstet Gynaecol Can.* 2011;33:736-750.  
29  
30  
31  
32 338 12. Engels MA, Bhola SL, Twisk JW et al. Evaluation of the introduction of the national Down  
33  
34 339 syndrome screening program in the Netherlands: age-related uptake of prenatal screening and  
35  
36 340 invasive diagnostic testing. *Eur J Obstet Gynecol Reprod Biol.* 2014;174:59-63.  
37  
38  
39  
40 341 13. Miltoft CB, Wulff CB, Kjærgaard S et al. Danish Fetal Medicine Study Group. Parental  
41  
42 342 Decisions about Prenatal Screening and Diagnosis among Infants with Trisomy 21 in a National  
43  
44 343 Cohort with High Uptake of Combined First-Trimester Screening. *Fetal Diagn Ther.*  
45  
46 344 2017;41:209-214.  
47  
48  
49  
50 345 14. Hayeems RZ, Campitelli M, Ma X et al.. Rates of prenatal screening across health care  
51  
52 346 regions in Ontario, Canada: a retrospective cohort study. *CMAJ Open.* 2015;3:E236-43.  
53  
54  
55  
56  
57  
58  
59  
60

- 1  
2  
3 347 15. Okun N, Teitelbaum M, Huang T et al. The price of performance: a cost and performance  
4  
5 348 analysis of the implementation of cell-free fetal DNA testing for Down syndrome in Ontario,  
6  
7 349 Canada. *Prenat Diagn.* 2014;34:350-6.
- 8  
9  
10 350 16. Chan YM, Leung WC, Chan WP et al. Women's uptake of non-invasive DNA testing  
11  
12 351 following a high-risk screening test for trisomy 21 within a publicly funded healthcare system:  
13  
14 352 findings from a retrospective review. *Prenat Diagn.* 2015 r;35:342-7.
- 15  
16  
17 353 17. Robson SJ, Hui L. National decline in invasive prenatal diagnostic procedures in association  
18  
19 354 with uptake of combined first trimester and cell-free DNA aneuploidy screening. *Aust N Z J*  
20  
21 355 *Obstet Gynaecol.* 2015;55:507-10.
- 22  
23  
24 356 18. Hui L, Muggli EE, Halliday JL. Population-based trends in prenatal screening and diagnosis  
25  
26 357 for aneuploidy: a retrospective analysis of 38 years of state-wide data. *BJOG.* 2016;123:90-7.
- 27  
28  
29 358 19. Hui L, Hutchinson B, Poulton A et al. Population-based impact of noninvasive prenatal  
30  
31 359 screening on screening and diagnostic testing for fetal aneuploidy. *Genet Med.* 2017;19:1338-  
32  
33 360 1345.
- 34  
35  
36 361 20. Gil MM, Giunta G, Macalli EA, Poon LC, Nicolaides KH. UK NHS pilot study on cell-free  
37  
38 362 DNA testing in screening for fetal trisomies: factors affecting uptake. *Ultrasound Obstet*  
39  
40 363 *Gynecol.* 2015;45:67-73.
- 41  
42  
43 364 21. Manegold-Brauer G, Berg C, Flöck A, Rüländ A, Gembruch U, Geipel A. Uptake of non-  
44  
45 365 invasive prenatal testing (NIPT) and impact on invasive procedures in a tertiary referral center.  
46  
47 366 *Arch Gynecol Obstet.* 2015;292:543-8.
- 48  
49  
50  
51  
52  
53  
54  
55  
56  
57  
58  
59  
60

1  
2  
3  
4  
5  
6  
7  
8  
9  
10  
11  
12  
13  
14  
15  
16  
17  
18  
19  
20  
21  
22  
23  
24  
25  
26  
27  
28  
29  
30  
31  
32  
33  
34  
35  
36  
37  
38  
39  
40  
41

LHINs with the highest and lowest utilization of MMS

| LHIN              | All pregnancies | Pregnancies with MMS | Uptake of MMS (%) |
|-------------------|-----------------|----------------------|-------------------|
| <b>Central</b>    | 68561           | 57289                | 83.6 (Highest)    |
| <b>North West</b> | 9299            | 2576                 | 27.7 (Lowest)     |
| <b>Ontario</b>    | 534210          | 359066               | 67.2 (All)        |

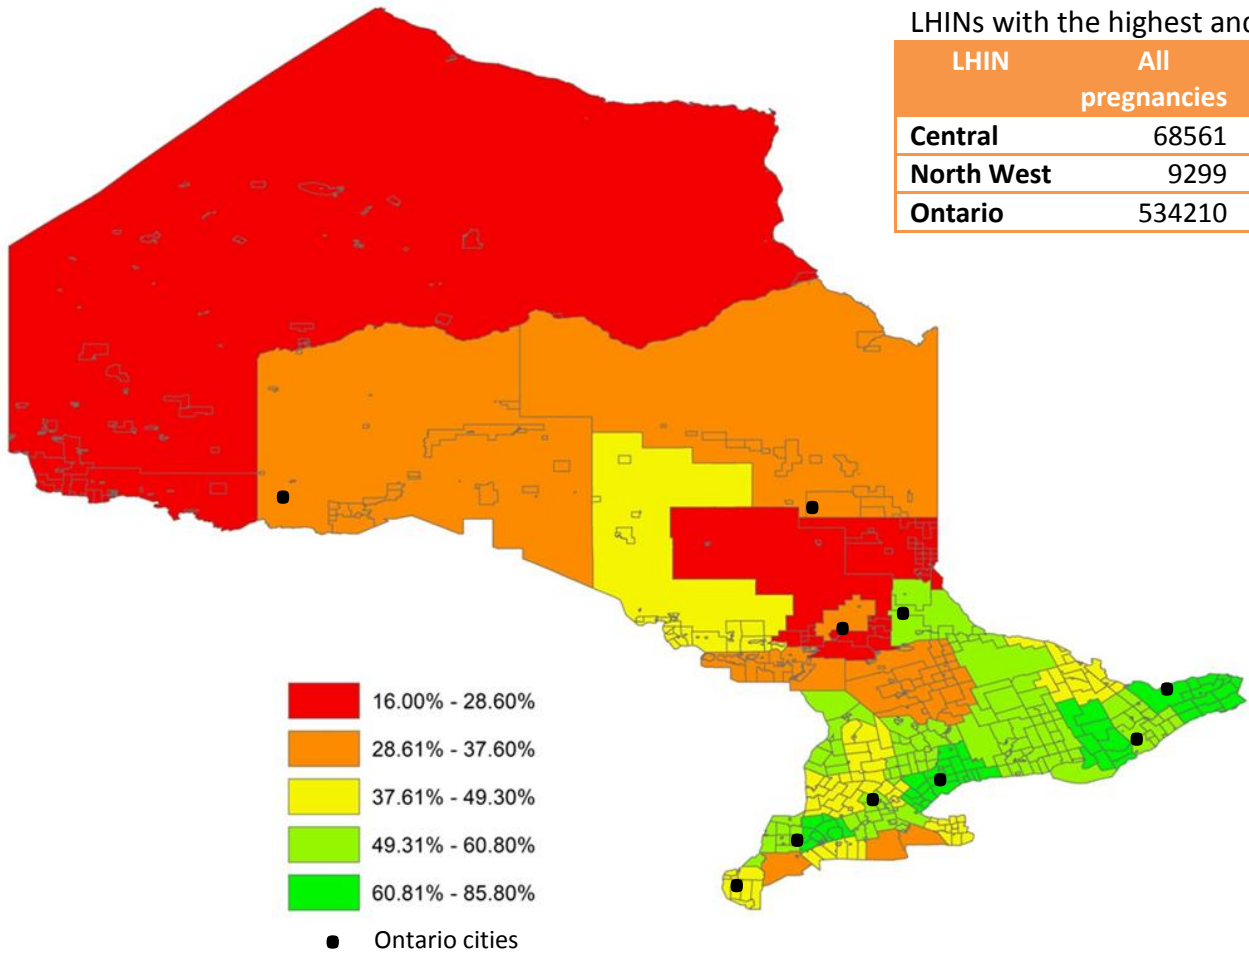

Figure 1. Utilization of MMS Among all Singleton Pregnancies with an EDD Between July 1 2012 and March 31 2016 by Census Division

LHINs with the highest and lowest utilization of cfDNA screening  
Following positive MMS

| LHIN                   | All pregnancies | Pregnancies with cfDNA | Uptake of cfDNA (%) |
|------------------------|-----------------|------------------------|---------------------|
| <b>Toronto Central</b> | 775             | 500                    | 64.5 (Highest)      |
| <b>North West</b>      | 33              | 8                      | 24.4 (Lowest)       |
| <b>Ontario</b>         | 6036            | 2947                   | 48.8 (All)          |

LHIN (Local Health Integration Networks)

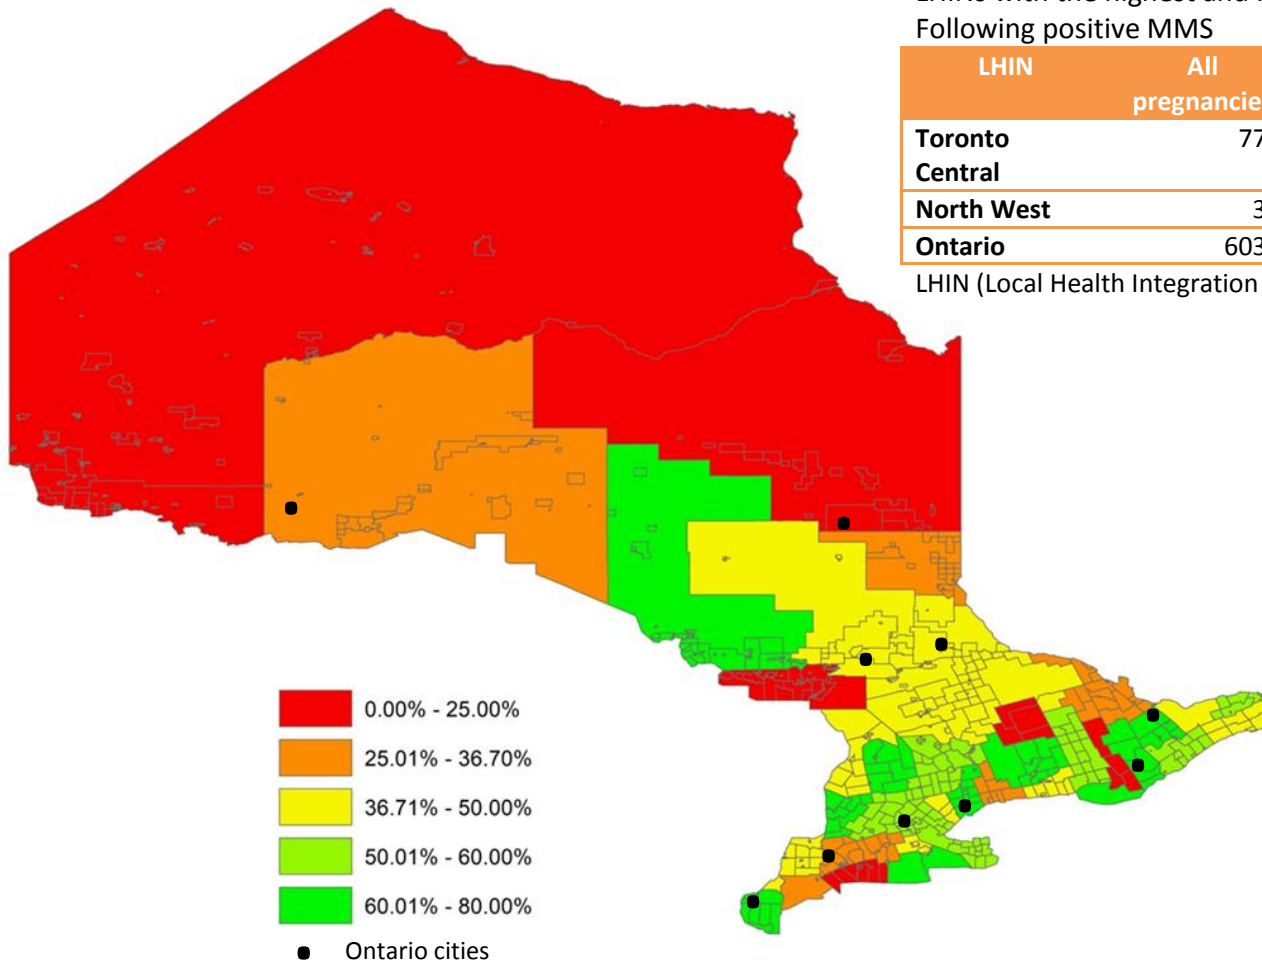

1  
2  
3  
4  
5  
6  
7  
8  
9  
10  
11  
12  
13  
14  
15  
16  
17  
18  
19  
20  
21  
22  
23  
24  
25  
26  
27  
28  
29  
30  
31  
32  
33  
34  
35  
36  
37  
38  
39  
40  
41

Figure 2 .Utilization of cfDNA screening Among MMS Positive Singleton Pregnancies with an EDD Between July 1 2014 and March 31 2016 by Census Division

Figure 3. Prenatal screening pathways before and after cfDNA screening was funded. Women who did not have a follow-up testing following a positive MMS were not shown

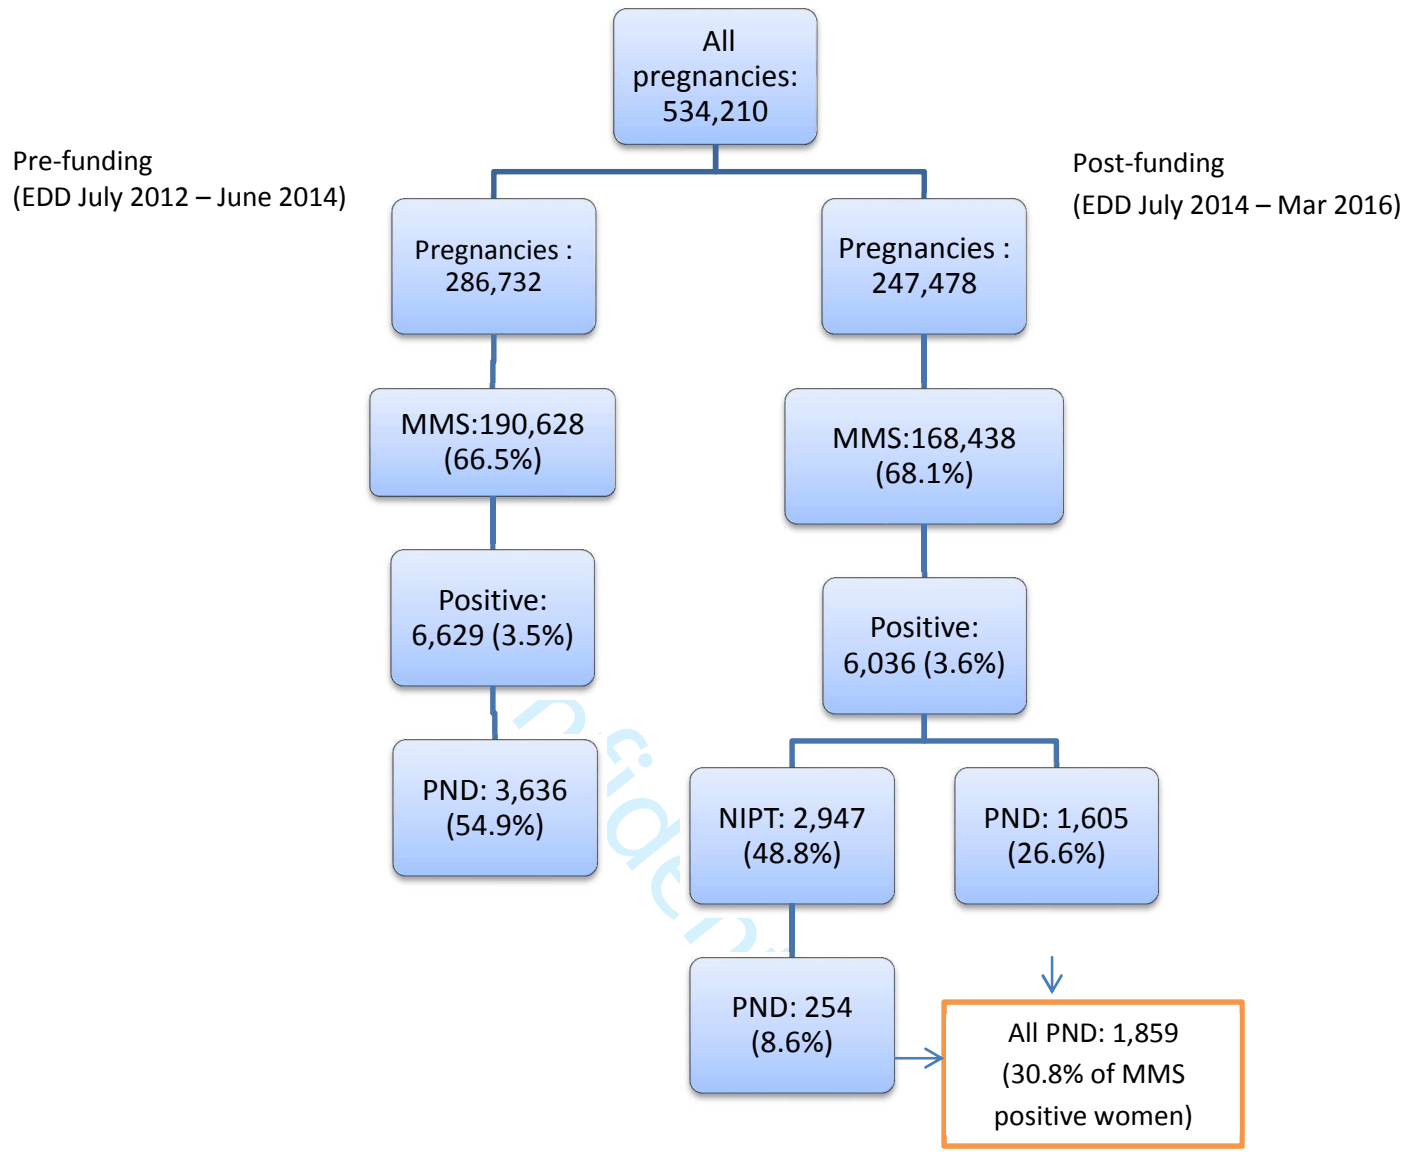



Figure 4. Uptake rates of MMS, cfDNA screening, and PND among all pregnancies (Ontario, Singleton, EDD between July 2012 and March 2016)

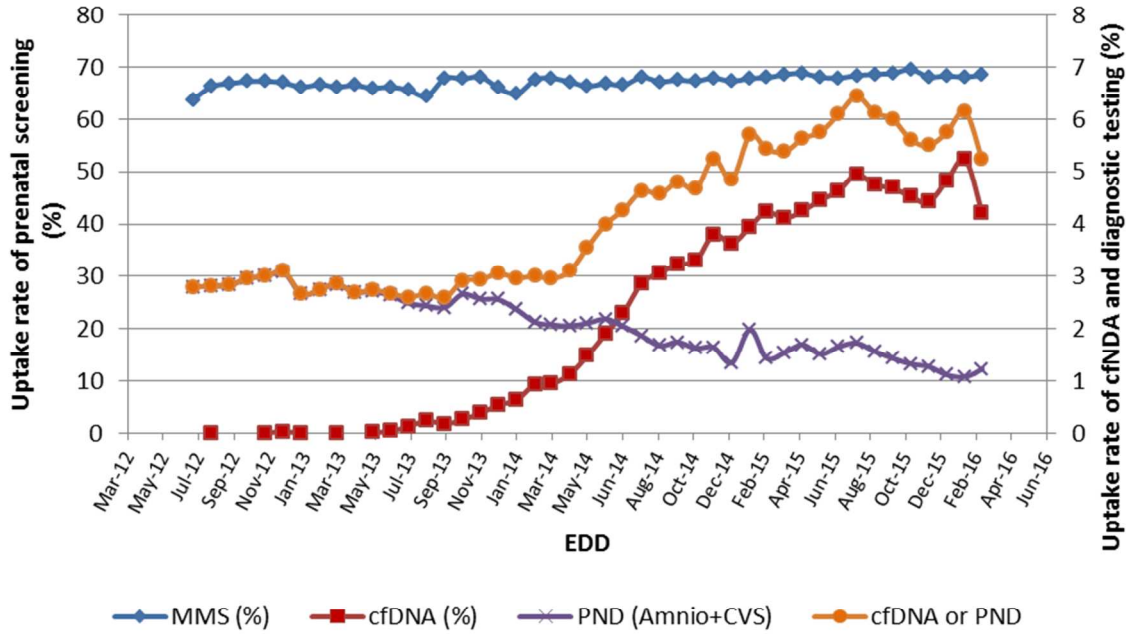

Figure 5. Utilization of cfDNA screening and PND among MMS positive pregnancies (Ontario, Singleton, EDD between July 2012-March 2016)

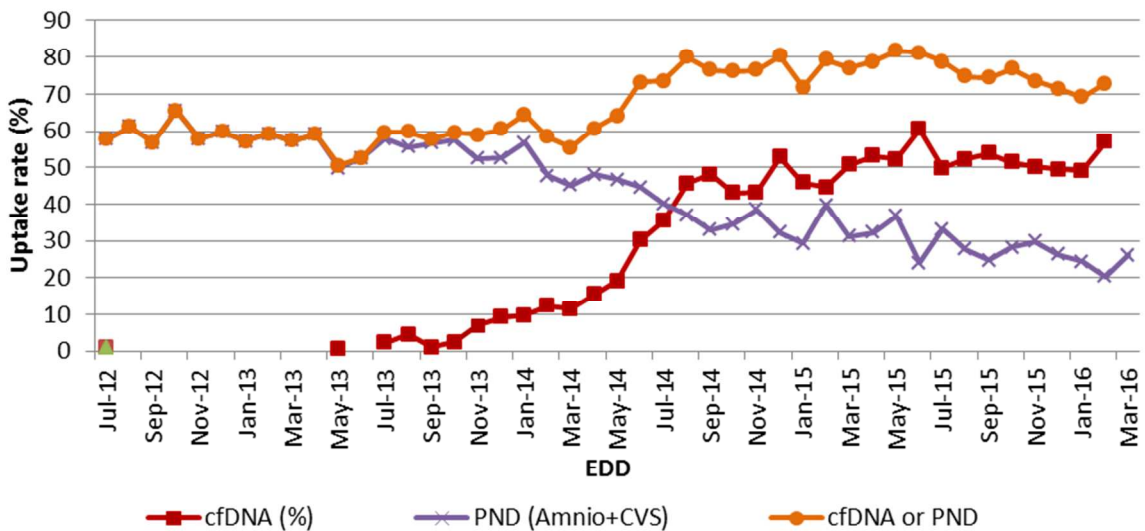

Table 1. Utilization of cfDNA screening and PND by the risk group of MMS (Ontario, singleton)

| MMS risk for Trisomy 21 | Before cfDNA screening was funded # |                |                                              | After cfDNA screening was funded ## |                   |                                              |
|-------------------------|-------------------------------------|----------------|----------------------------------------------|-------------------------------------|-------------------|----------------------------------------------|
|                         | Uptake of cfDNA screening (%)       | Uptake of PND# | Uptake of cfDNA screening or PND testing (%) | Uptake of cfDNA screening (%)       | Uptake of PND (%) | Uptake of cfDNA screening or PND testing (%) |
| ≥ 1 in 10               | 4                                   | 67.53          | 70.19                                        | 30.5                                | 54.08             | 76.07                                        |
| 1 in 11- 1 in 50        | 6.08                                | 63.07          | 67.8                                         | 44.28                               | 40.47             | 78.77                                        |
| 1 in 51- 1 in 100       | 7.98                                | 55.89          | 62.62                                        | 51.13                               | 29.22             | 77.28                                        |
| 1 in 101- 1 in 200      | 6.39                                | 50.88          | 56.26                                        | 55.1                                | 23.51             | 76.28                                        |
| 1 in 201- 1 in 350      | 3.1                                 | 13.07          | 15.94                                        | 25.2                                | 6.02              | 29.94                                        |
| 1 in 351- 1 in 500      | 1.35                                | 6.43           | 7.47                                         | 12.5                                | 2.31              | 14.62                                        |
| 1 in 501- 1 in 1000     | 1.11                                | 4.1            | 5.15                                         | 9.29                                | 1.64              | 10.64                                        |
| 1 in 1000- 1 in 5000    | 0.63                                | 1.97           | 2.56                                         | 5.34                                | 1.01              | 6.19                                         |
| < 1 in 5000             | 0.23                                | 0.65           | 0.88                                         | 2.03                                | 0.45              | 2.44                                         |
| All risk group*         | 0.58                                | 3.25           | 3.77                                         | 4.96                                | 1.89              | 6.61                                         |

\* all risk groups plus no MMS result

# EDD before July 2014

## EDD between July 2014 and March 2016

STROBE Statement—Checklist of items that should be included in reports of *cohort studies*

|                              | Item No | Recommendation                                                                                                                                                                                    | Page Number |
|------------------------------|---------|---------------------------------------------------------------------------------------------------------------------------------------------------------------------------------------------------|-------------|
| <b>Title and abstract</b>    | 1       | (a) Indicate the study's design with a commonly used term in the title or the abstract                                                                                                            | 1           |
|                              |         | (b) Provide in the abstract an informative and balanced summary of what was done and what was found                                                                                               | 3           |
| <b>Introduction</b>          |         |                                                                                                                                                                                                   |             |
| Background/rationale         | 2       | Explain the scientific background and rationale for the investigation being reported                                                                                                              | 5-6         |
| Objectives                   | 3       | State specific objectives, including any prespecified hypotheses                                                                                                                                  | 6           |
| <b>Methods</b>               |         |                                                                                                                                                                                                   |             |
| Study design                 | 4       | Present key elements of study design early in the paper                                                                                                                                           | 7-9         |
| Setting                      | 5       | Describe the setting, locations, and relevant dates, including periods of recruitment, exposure, follow-up, and data collection                                                                   | 7           |
| Participants                 | 6       | (a) Give the eligibility criteria, and the sources and methods of selection of participants. Describe methods of follow-up                                                                        | 7-8         |
|                              |         | (b) For matched studies, give matching criteria and number of exposed and unexposed                                                                                                               | 7           |
| Variables                    | 7       | Clearly define all outcomes, exposures, predictors, potential confounders, and effect modifiers. Give diagnostic criteria, if applicable                                                          | 9           |
| Data sources/<br>measurement | 8*      | For each variable of interest, give sources of data and details of methods of assessment (measurement). Describe comparability of assessment methods if there is more than one group              | 7           |
| Bias                         | 9       | Describe any efforts to address potential sources of bias                                                                                                                                         | 8           |
| Study size                   | 10      | Explain how the study size was arrived at                                                                                                                                                         | 8-9         |
| Quantitative variables       | 11      | Explain how quantitative variables were handled in the analyses. If applicable, describe which groupings were chosen and why                                                                      | 8-9         |
| Statistical methods          | 12      | (a) Describe all statistical methods, including those used to control for confounding                                                                                                             | 9           |
|                              |         | (b) Describe any methods used to examine subgroups and interactions                                                                                                                               | 9           |
|                              |         | (c) Explain how missing data were addressed                                                                                                                                                       | N/A         |
|                              |         | (d) If applicable, explain how loss to follow-up was addressed                                                                                                                                    | N/A         |
|                              |         | (e) Describe any sensitivity analyses                                                                                                                                                             | N/A         |
| <b>Results</b>               |         |                                                                                                                                                                                                   |             |
| Participants                 | 13*     | (a) Report numbers of individuals at each stage of study—eg numbers potentially eligible, examined for eligibility, confirmed eligible, included in the study, completing follow-up, and analysed | 10          |
|                              |         | (b) Give reasons for non-participation at each stage                                                                                                                                              | N/A         |
|                              |         | (c) Consider use of a flow diagram                                                                                                                                                                | Figure 3    |
| Descriptive data             | 14*     | (a) Give characteristics of study participants (eg demographic, clinical, social) and information on exposures and potential confounders                                                          | 10          |
|                              |         | (b) Indicate number of participants with missing data for each variable of interest                                                                                                               | 10          |
|                              |         | (c) Summarise follow-up time (eg, average and total amount)                                                                                                                                       | N/A         |
| Outcome data                 | 15*     | Report numbers of outcome events or summary measures over time                                                                                                                                    | 10-11       |
| Main results                 | 16      | (a) Give unadjusted estimates and, if applicable, confounder-adjusted estimates and their precision (eg, 95% confidence interval). Make clear                                                     | N/A         |

|                          |    |                                                                                                                                                                            |                |
|--------------------------|----|----------------------------------------------------------------------------------------------------------------------------------------------------------------------------|----------------|
|                          |    | which confounders were adjusted for and why they were included                                                                                                             |                |
|                          |    | (b) Report category boundaries when continuous variables were categorized                                                                                                  | 11 and Table 1 |
|                          |    | (c) If relevant, consider translating estimates of relative risk into absolute risk for a meaningful time period                                                           |                |
| Other analyses           | 17 | Report other analyses done—eg analyses of subgroups and interactions, and sensitivity analyses                                                                             | N/A            |
| <b>Discussion</b>        |    |                                                                                                                                                                            |                |
| Key results              | 18 | Summarise key results with reference to study objectives                                                                                                                   | 12-13          |
| Limitations              | 19 | Discuss limitations of the study, taking into account sources of potential bias or imprecision. Discuss both direction and magnitude of any potential bias                 | 15             |
| Interpretation           | 20 | Give a cautious overall interpretation of results considering objectives, limitations, multiplicity of analyses, results from similar studies, and other relevant evidence | 15             |
| Generalisability         | 21 | Discuss the generalisability (external validity) of the study results                                                                                                      | 15             |
| <b>Other information</b> |    |                                                                                                                                                                            |                |
| Funding                  | 22 | Give the source of funding and the role of the funders for the present study and, if applicable, for the original study on which the present article is based              | 2              |

\*Give information separately for exposed and unexposed groups.

**Note:** An Explanation and Elaboration article discusses each checklist item and gives methodological background and published examples of transparent reporting. The STROBE checklist is best used in conjunction with this article (freely available on the Web sites of PLoS Medicine at <http://www.plosmedicine.org/>, Annals of Internal Medicine at <http://www.annals.org/>, and Epidemiology at <http://www.epidem.com/>). Information on the STROBE Initiative is available at <http://www.strobe-statement.org>.
